# Supplementary material for: A lead-free I-based hybrid double perovskite (I-C4H8NH3)4AgBiI8 for X-ray detection
Source: Royal Society of Chemistry journal article supplement (doi:10.1039/d1tc03412j), 2021-01-01
Supplement: d1tc03412j1.pdf [file d1tc03412j1.pdf]

## Supporting Information

### **A Lead-Free I-Based Hybrid Double Perovskite (I-C<sub>4</sub>H<sub>8</sub>NH<sub>3</sub>)<sub>4</sub>AgBiI<sub>8</sub> for X-ray Detection**

Zhijin Xu,<sup>a,b</sup> Huajie Wu,<sup>a,b</sup> Dong Li,<sup>a,b</sup> Wentao Wu,<sup>a,b</sup> Lina Li,<sup>\*,a,b,c</sup> and Junhua Luo<sup>a,b,c</sup>

*a College of Chemistry, Fuzhou University, Fuzhou 350116, China.*

*b State Key Laboratory of Structural Chemistry, Fujian Institute of Research on the  
Structure of Matter, Chinese Academy of Sciences, Fuzhou, Fujian 350002, China*

*Fax: +86-591-63173127; Email: lilina@fjirsm.ac.cn*

*c University of Chinese Academy of Sciences, Beijing, 100049, China*

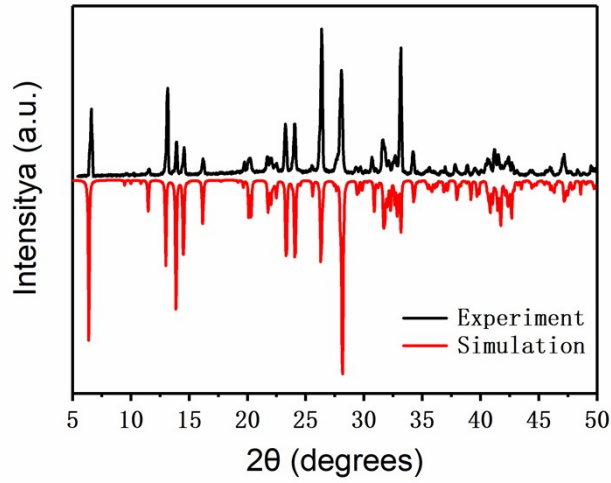

Figure S1. X-ray diffraction patterns for IAB

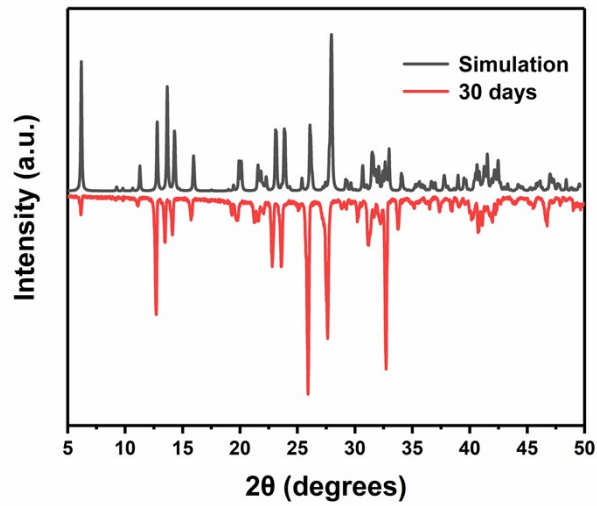

Figure S2. X-ray diffraction patterns for IAB after 30 days

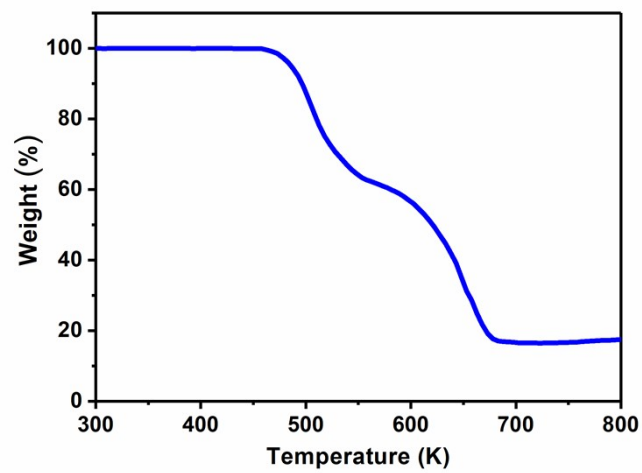

Figure S3. Thermogravimetric analysis of IAB.

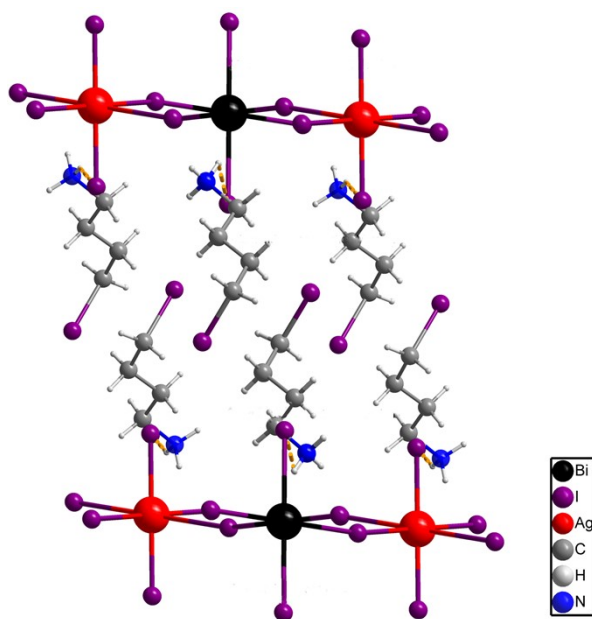

**Figure S4.** Hydrogen bonds in the compound **IAB** (Hydrogen bonds are represented by dotted lines).

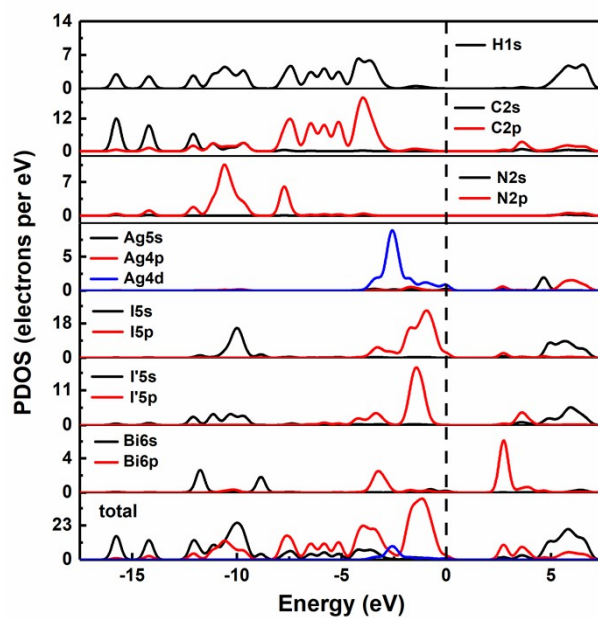

**Figure S5.** Partial density of states of **IAB**.

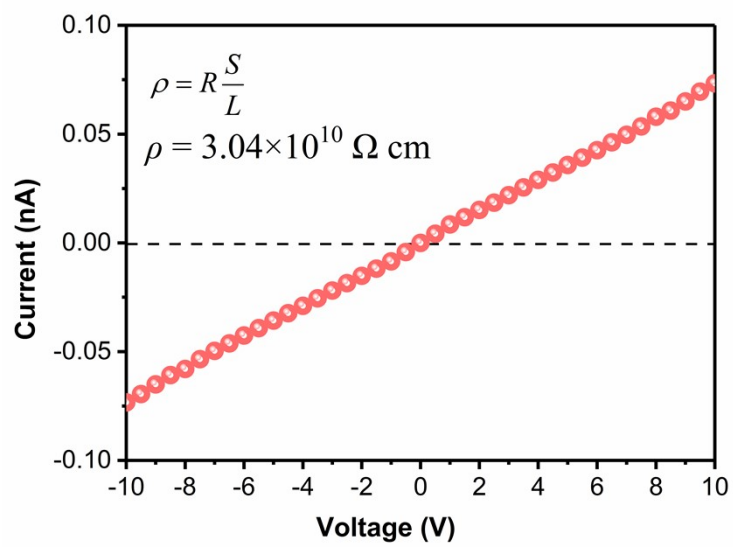

Figure S6. Bulk resistivity of IAB

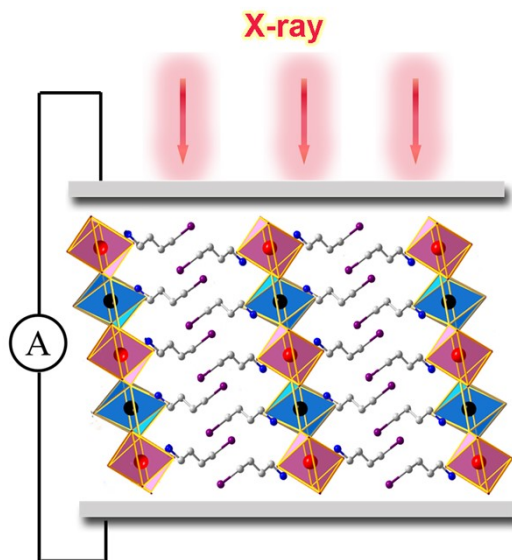

Figure S7. Schematic structure of the X-ray photoconductor based on the single crystal of IAB.

**Table S1.** Crystal data and structure refinement for **IAB**

|                                                      |                                                                              |
|------------------------------------------------------|------------------------------------------------------------------------------|
| Empirical formula                                    | C <sub>16</sub> H <sub>44</sub> N <sub>4</sub> AgBiI <sub>12</sub>           |
| Formula weight                                       | 2132.2                                                                       |
| Temperature/K                                        | 100.0                                                                        |
| Crystal system                                       | triclinic                                                                    |
| Space group                                          | <i>P</i> -1                                                                  |
| <i>a</i> /Å                                          | 8.8214 (3)                                                                   |
| <i>b</i> /Å                                          | 9.1445 (5)                                                                   |
| <i>c</i> /Å                                          | 13.6531 (8)                                                                  |
| $\alpha$ /°                                          | 89.767 (5)                                                                   |
| $\beta$ /°                                           | 79.205 (4)                                                                   |
| $\gamma$ /°                                          | 89.824 (4)                                                                   |
| Volume/Å <sup>3</sup>                                | 1081.86 (10)                                                                 |
| <i>Z</i>                                             | 1                                                                            |
| $\rho_{\text{calc}}$ g/cm <sup>3</sup>               | 3.273                                                                        |
| $\mu$ /mm <sup>-1</sup>                              | 13.090                                                                       |
| F(000)                                               | 934.0                                                                        |
| Radiation                                            | MoK $\alpha$ ( $\lambda$ = 0.71073)                                          |
| Theta range (°)                                      | 6.786 to 59.47                                                               |
| Index ranges                                         | -12 ≤ <i>h</i> ≤ 10, -12 ≤ <i>k</i> ≤ 11,<br>-18 ≤ <i>l</i> ≤ 17             |
| Reflections collected                                | 12832                                                                        |
| Independent reflections                              | 8192 [ <i>R</i> <sub>int</sub> = 0.0546, <i>R</i> <sub>sigma</sub> = 0.0520] |
| Data/restraints/parameters                           | 5223/6/159                                                                   |
| GOF                                                  | 1.125                                                                        |
| Final <i>R</i> indexes [ <i>I</i> ≥ 2σ ( <i>I</i> )] | <i>R</i> <sub>1</sub> = 0.0456,<br><i>wR</i> <sub>2</sub> = 0.1552           |
| Final <i>R</i> indexes [all data]                    | <i>R</i> <sub>1</sub> = 0.0508,<br><i>wR</i> <sub>2</sub> = 0.1605           |
| CCDC number                                          | 2086155                                                                      |
